# Supplementary material
Source: Research Square preprint supplement (doi:10.21203/rs.3.rs-9034659/v1)
Supplement: Supplementary file 1 [file 14041e4f157d925fc5d7964a.docx]

| **Please describe your use of CBT skills in your life now. (n=25)** | **If you continue to use skills, how frequently do you use CBT Skills (e.g., once a week, once a day, several times a day, depends on circumstances)? (n=23)** |
| --- | --- |
| The key skills I use from the CBT workbook and course is to meditate daily and practice mindfulness regularly. The introduction to mindfulness and meditation has literally changed my life. Thank-you! | I meditate every day, it has become an important if not vital part of my life. I try to be mindful everyday and succeed in practicing mindfulness between 4-6 times daily. |
| Breathing and better understanding of my reactions and how to cope with them . | It can be once a day , or several times a day depending on the situation I'm in . |
| I do not use the book. I should. But I do use the breathing technique to calm me, self talk, noticing. In noticing, I find that being aware of what is happening and naming it helps diffuse it. | Once a day |
| since my meds kicked in, most all my problems have been fixed | cant really discern that |
| Breathing to gain control of emotions. Am now retired but did make up cards of several skills to help me when I was at work such as dial it up or down and mindfulness that I could use as reminders. | Depends on circumstances. Sometimes I use distraction and or exercise (housework or walks). |
| recognizing issues not my fault. bushwacking. understanding anger better. relaxing. being my best friend. | probably several times a day. |
| being aware of my thoughts and choosing more positive one when I catch myself anxious due to negative one | everyday, often |
| I practice the deep breathing, progressive muscle relaxation, and meditation when I am feeling very overwhelmed. | Depends on circumstances. Deep breathing, a few times a day, the others, as I feel they are needed. |
| I stop and think, and do the breathing exercises. | Several times per week |
| Nothing, really. |  |
| Breathing exercises, tighten/ loosen muscles, affirmations, brain exercises, etc. | Generally several times a day. Too often I am not capable or focused enough to even think about using skills. All too often I am in disconnect mode. |
| I use the CBT skills & mindful meditation all the time. I especially use them in stressful times or during situations where anxiety and/or fear will grip me. | I use them as often as necessary - I use them frequently with my elderly father who lives with me to assist him and myself in being more positive. Every time I have an anxiety attack I use the skills to bring myself down to a manageable emotional state. |
| I use many of the exercises regularly to help my self refocus when trigger situations or thoughts arise. I can now defuse from thoughts, identify hot thoughts and use mindfulness pracice to connect with the present. | Everyone to help control my anxiety. The book and course have helped me a lot. |
| Opposite action, coping statements | Less thAn once a week |
| It makes me more aware of how bad things are. | several times per day, probably more than every second hour. |
| being present, recognizing the nervous systems response to stress and stepping back to take time to reflect and choose a more calm positive response. | every day during stressful situations |
| Baby steps, One breath, Ride the Wave | Depends on Circumstances |
| I used the skills as needed in tough situations. The most useful CBT skills for me are the ones that are used in the middle of difficult situations. | My need for CBT skills has been greatly reduced. I find myself using the skills about once a week. |
| (no response provided) | I moved cities in August and have not looked at my book since. I would like to get back to using these skills. |
| I use pausing and breathing. I am not believing everything I think. These are my two that I use the most. Regular yoga. Figuring out what my triggers are and how it relates to my core values. Loving kindness. Less thinking traps. Compassionate awareness has been a big one for me. My sister in law is dying and this has been an extremely difficult emotional time for me. The numbers above reflect this but I know without having done CBT my numbers would be off the scale in every area. I have noticed a difference in how I am choosing to react. | It depends on the situation but I do find regularly that I am reacting differently than I did last year. It might happen after the fact but I do recognize thinking traps, triggers, feelings,thoughts and linked behaviors. On a regular basis I am trying to pause before I think and speak. |
| I use skills related to ones that I learned at CBT about every day, but the perspective and awareness that I developed during my time in the CBT course have positively affected my life. | I create space to slow down and process things just about every day at work, or at home. |
| Breathing, power pose, cold water, writing, id emotions, swapping thoughts | 1-2/day |
| I often forget about the skills until I am having heightened anxiety. Then I tend to use the breathing counting skill to get through it. | (no response provided) |
| rarely think about it | (no response provided) |
| I find myself able to use one or more of the CBT tools whenever I find myself feeling a bit stressed, anxious or depressed. I find them particularly effective when I have a quick negative reaction to a situation. I am able to remember a CBT tool and utilize it, and get my symptoms to a more manageable state | it really does depend on the circumstances. In some cases, I may use a tool more than once during a day; in other cases, it can be many days between situations |
| Grounding, redirecting thoughts, | Daily |
