# Supplementary material
Source: Research Square preprint supplement (doi:10.21203/rs.3.rs-9034659/v1)
Supplement: Supplementary file 2 [file 7ed62df85f7770a125f7c01d.docx]

Supplementary Appendix 1

Participant Questionnaire (12-Month Follow-up)

The following questions were administered to participants at the 12-month follow-up time point to explore continued use of cognitive behavioural therapy (CBT) skills following completion of the CBT skills group intervention. Participants were invited to provide written responses to the following open-ended questions.

Question 1
Please describe your use of CBT skills in your life now.

(Open-ended response)

Question 2
If you continue to use CBT skills, how frequently do you use them?
For example: once a week, once a day, several times a day, or depending on circumstances.

(Open-ended response)
